# Supplementary material for: Climate change causes critical transitions and irreversible alterations of mountain forests
Source: PubMed Central journal article supplement (PMC7317840; doi:10.1111/gcb.15118), 2020-05-08

Supplementary Material S2 for:

**Climate change causes critical transitions and irreversible alterations of mountain  
forests**

Katharina Albrich, Werner Rammer, Rupert Seidl

**Spatial development of indicators**

Pages 2-9: Share of Norway Spruce

Pages 10-17: Number of Stems larger than 30 cm per ha

All values averaged across 10 replicates for each 1 ha (100x100 m) pixel over 50 years at the end of each 1000 years simulation at each temperature step.

# Baseline, uniform topo

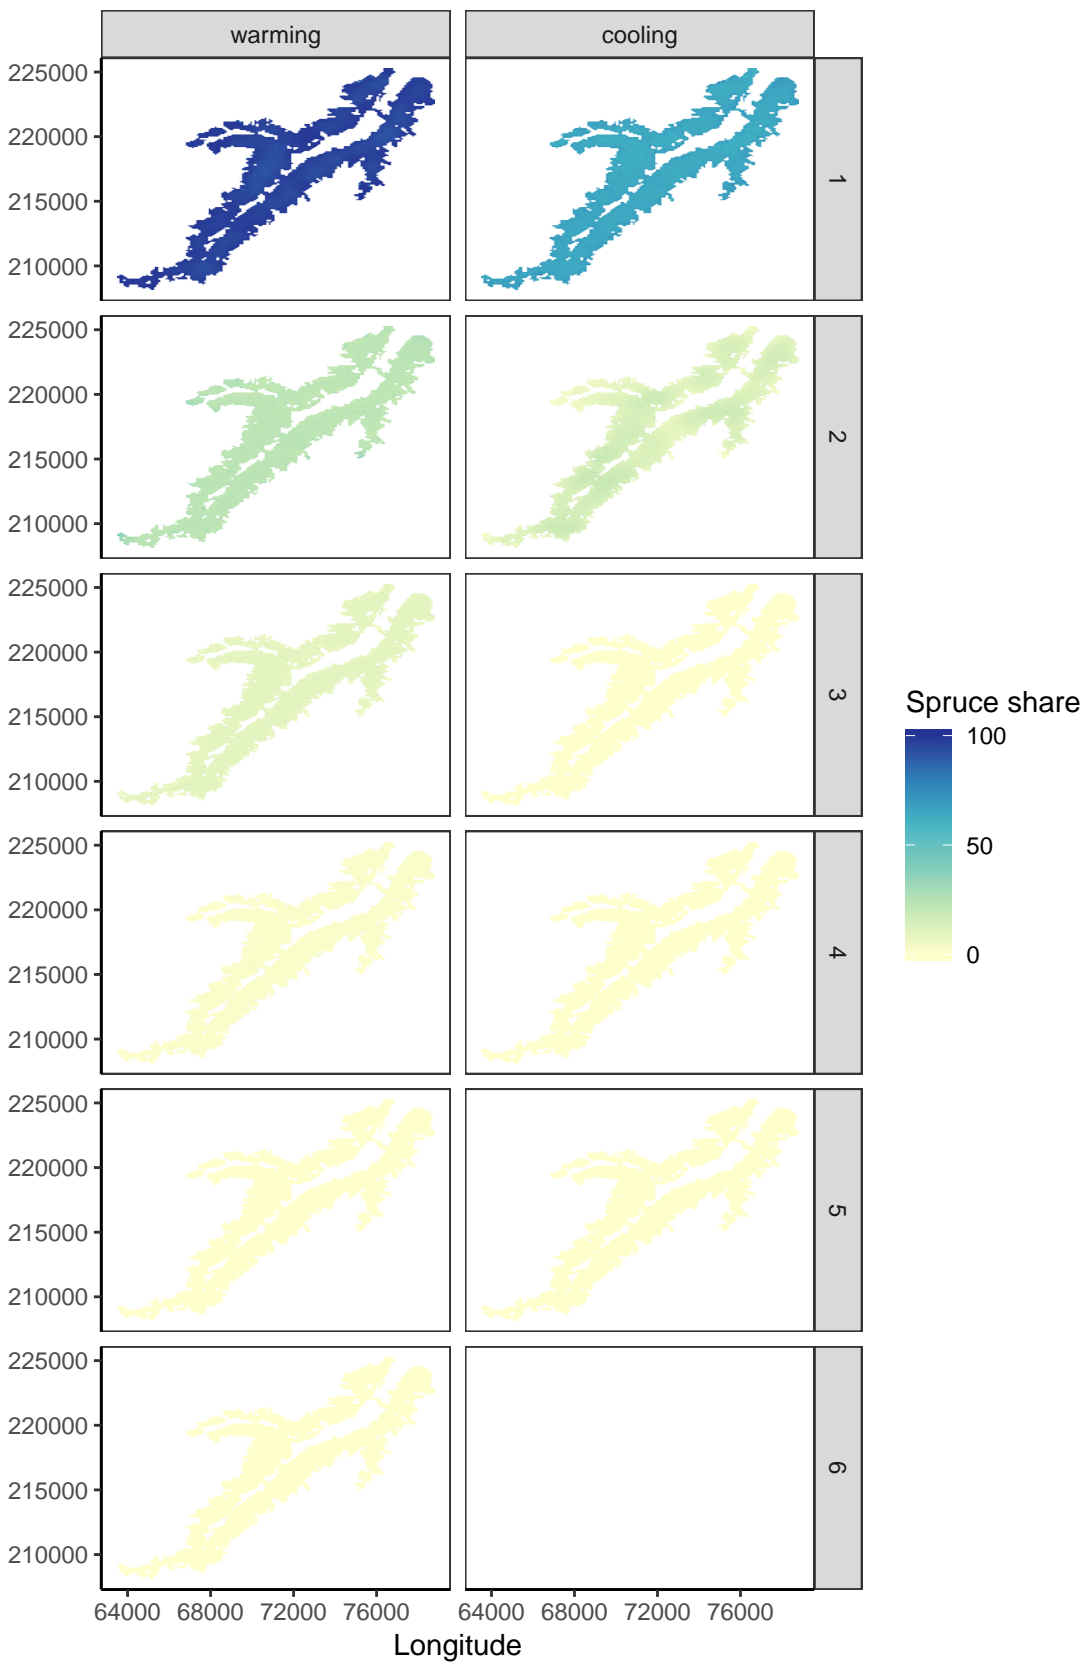

-10 %, uniform topo

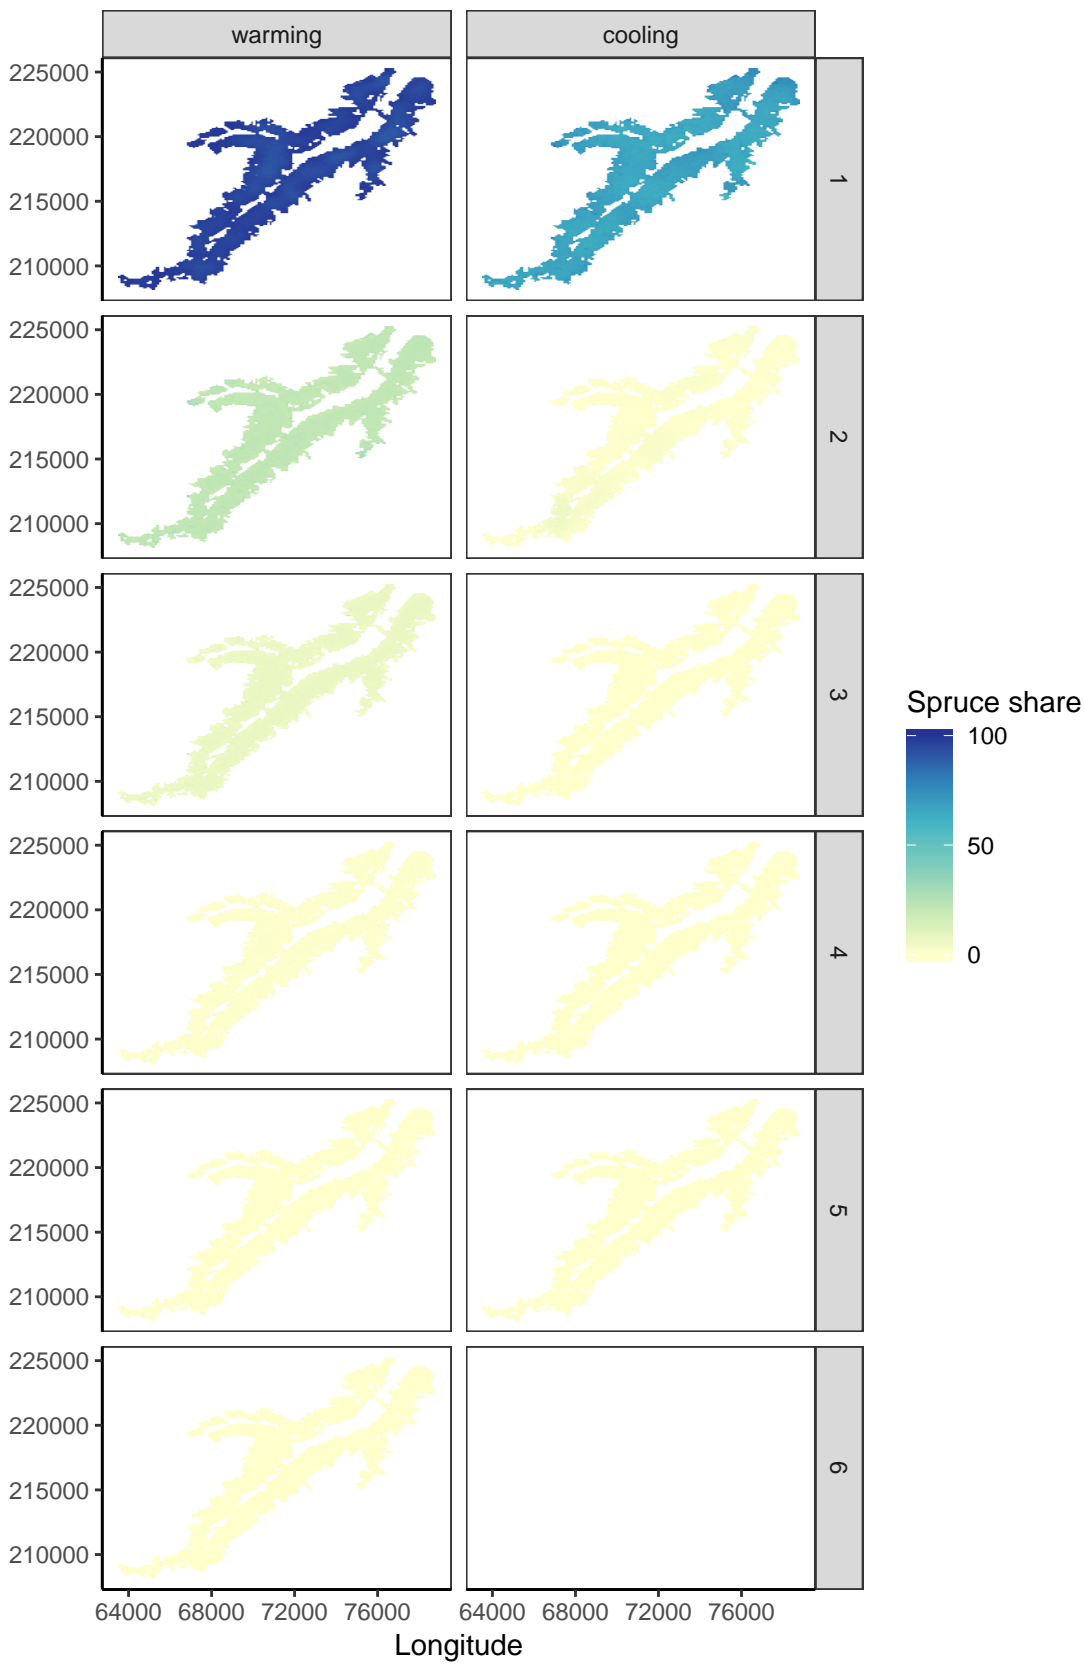

-20 %, uniform topo

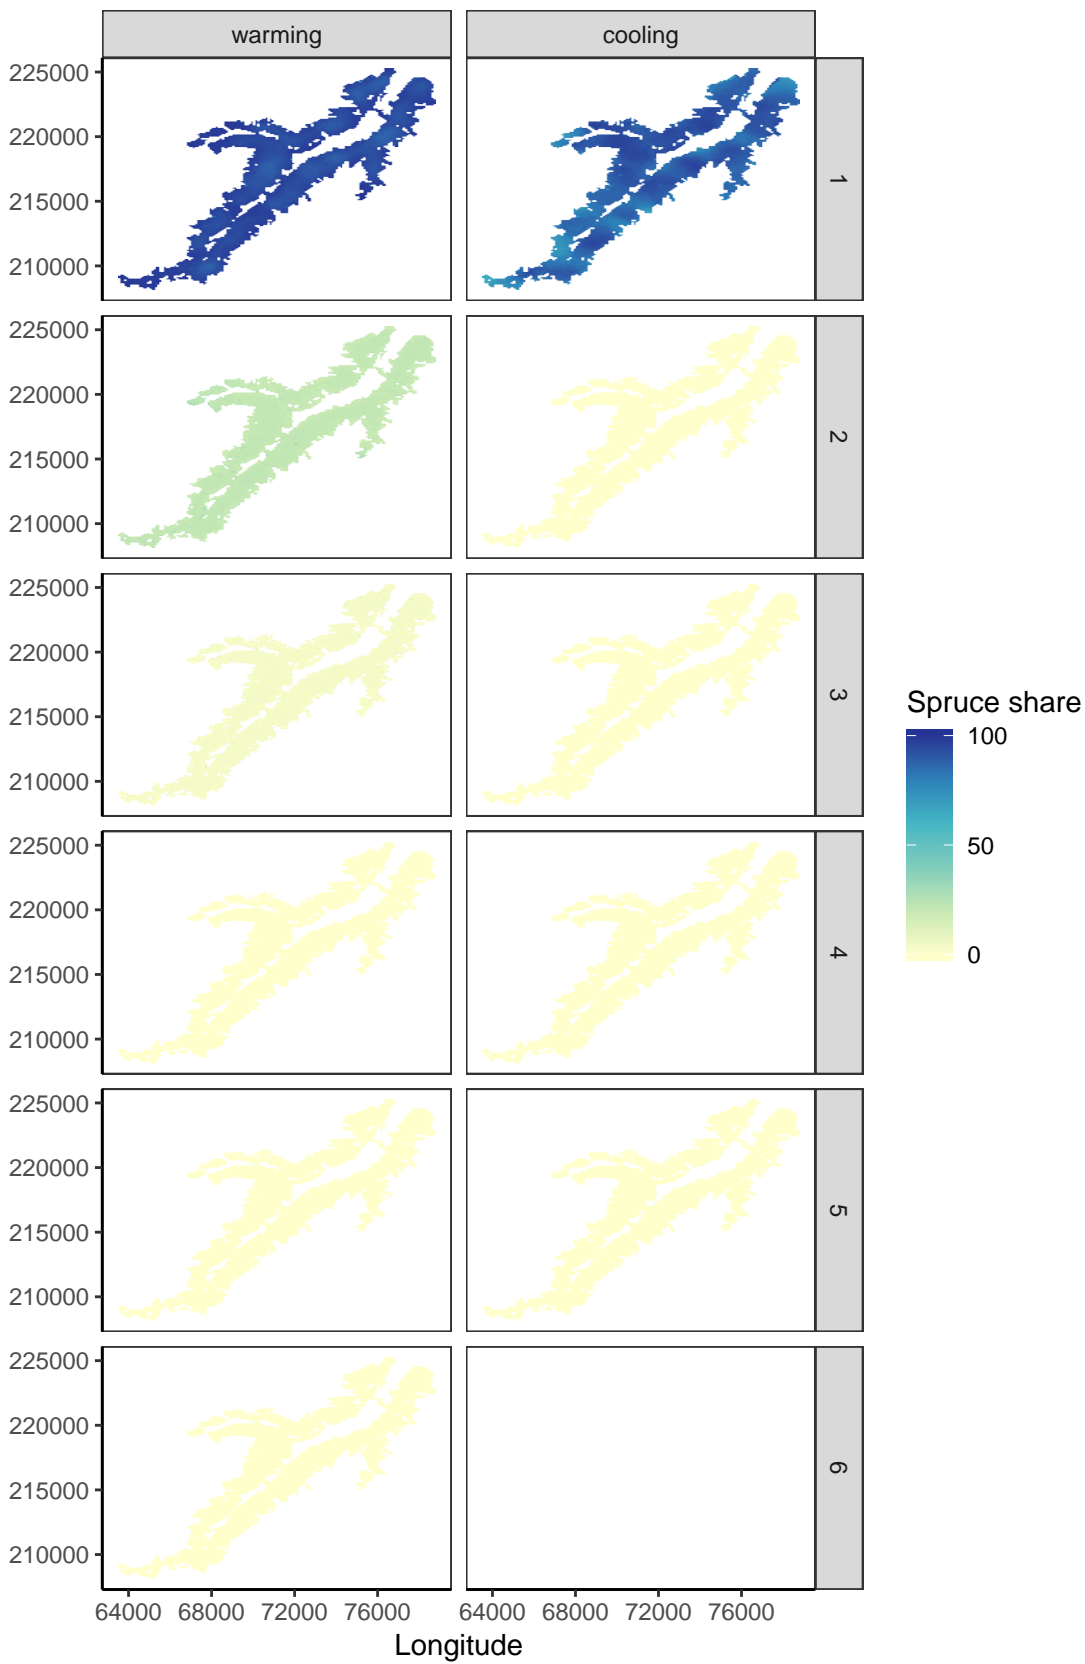

-30 %, uniform topo

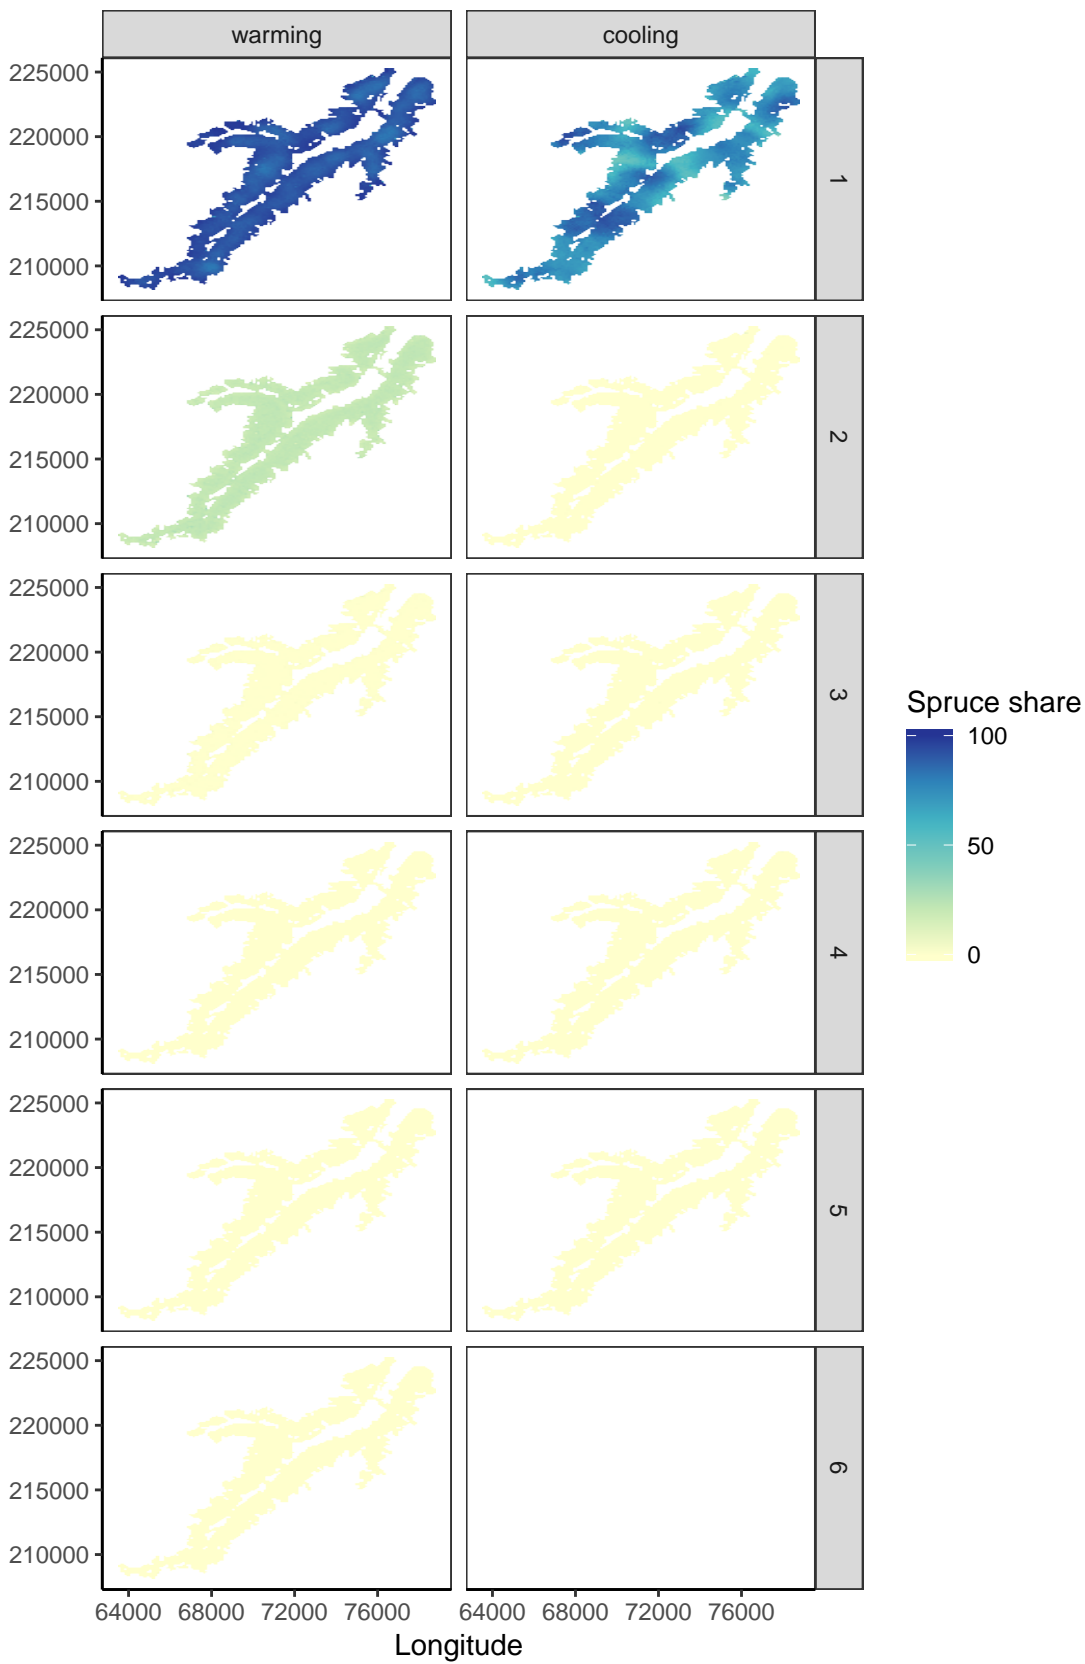

# Baseline, complex topo

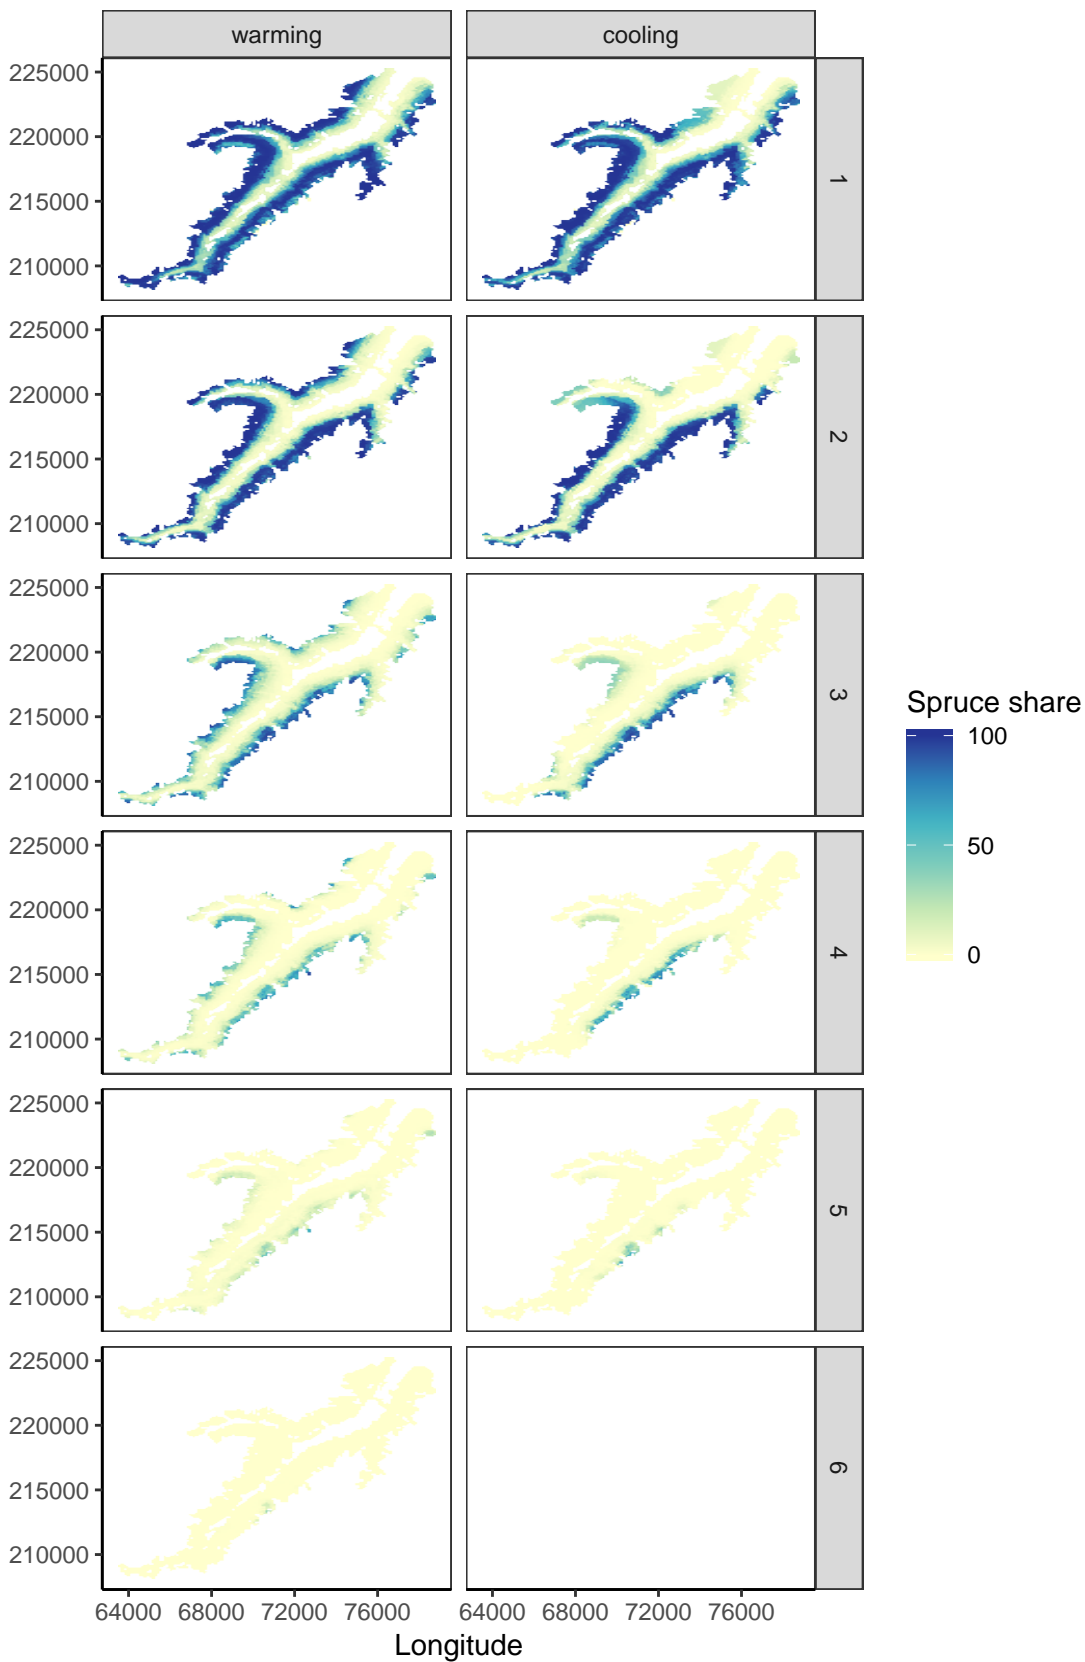

# -10 %, complex topo

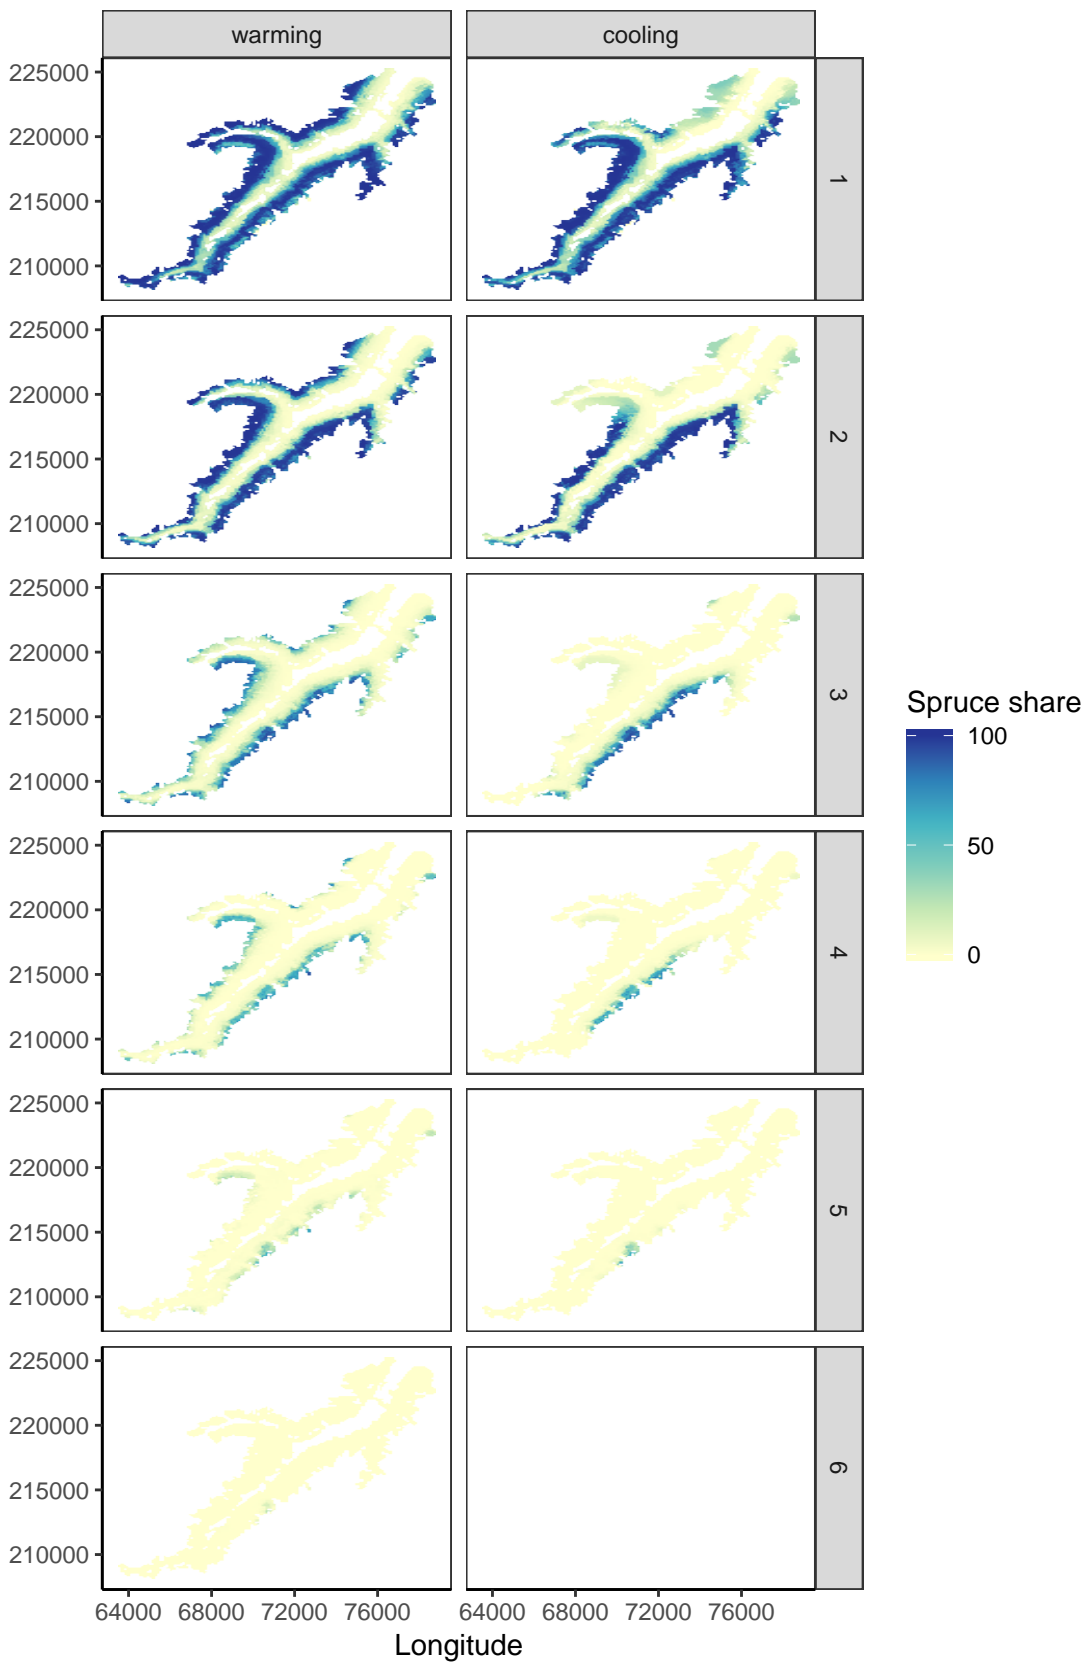

# -20 %, complex topo

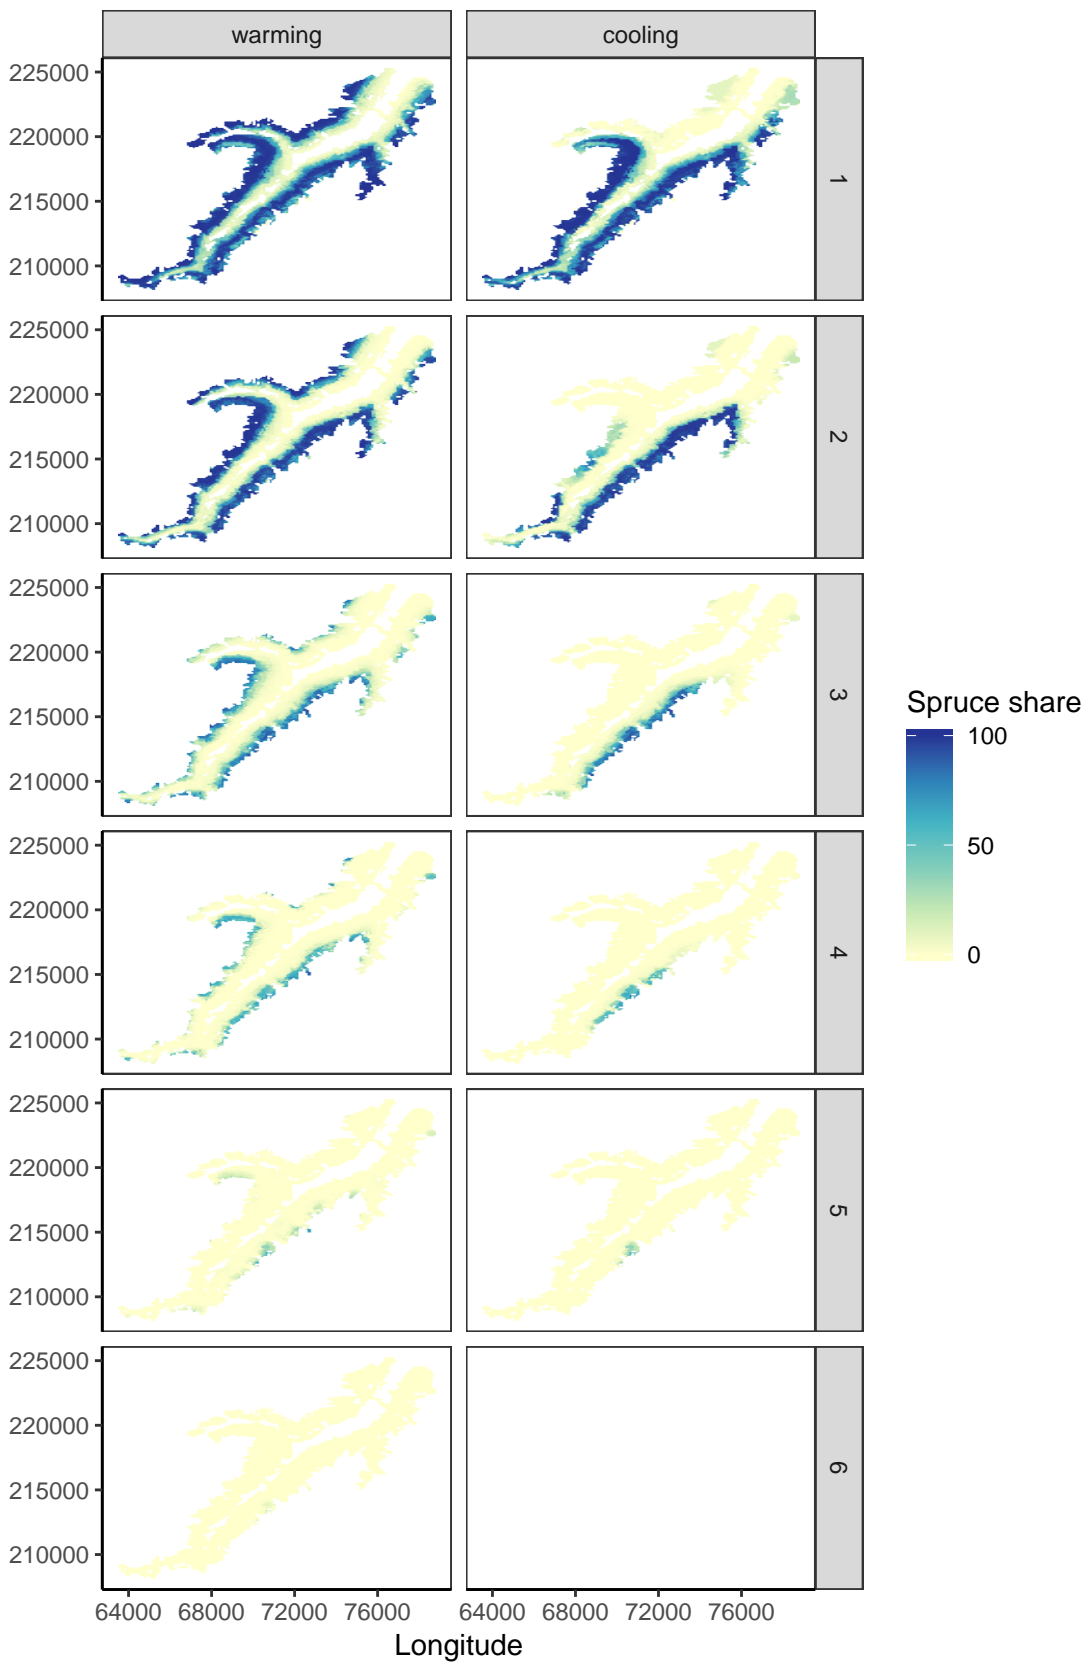



# -30 %, complex topo

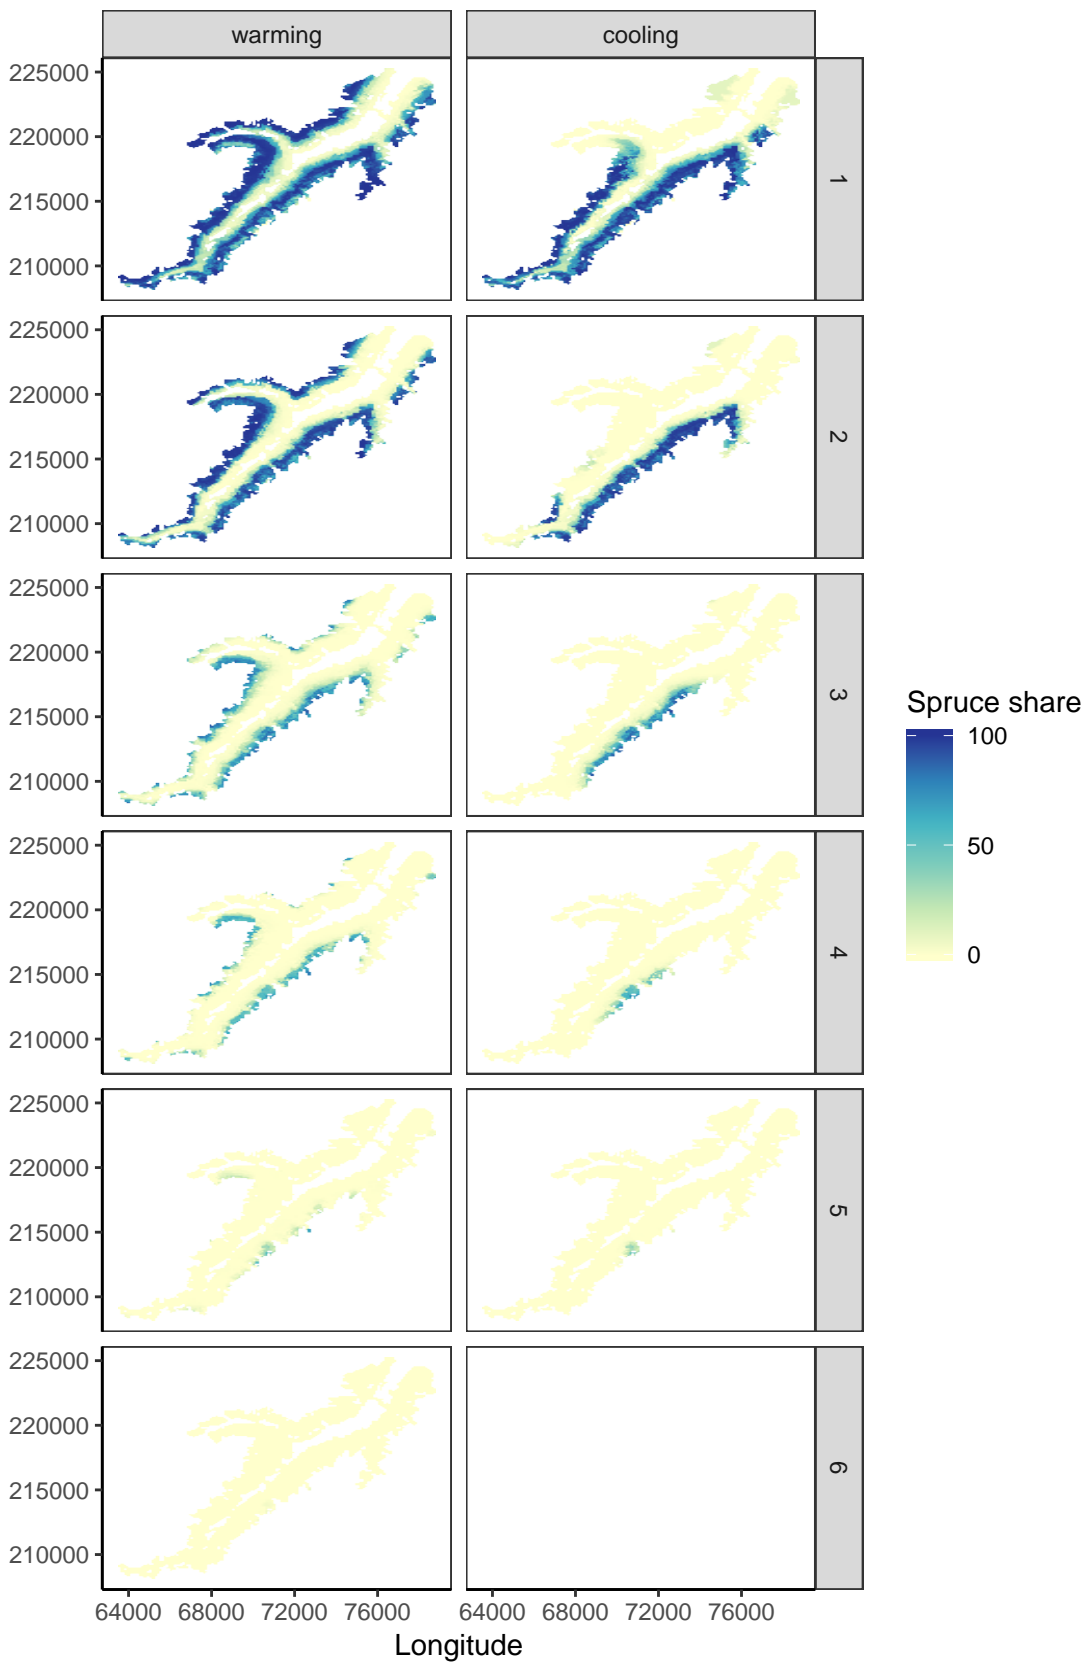

# Baseline, uniform topo

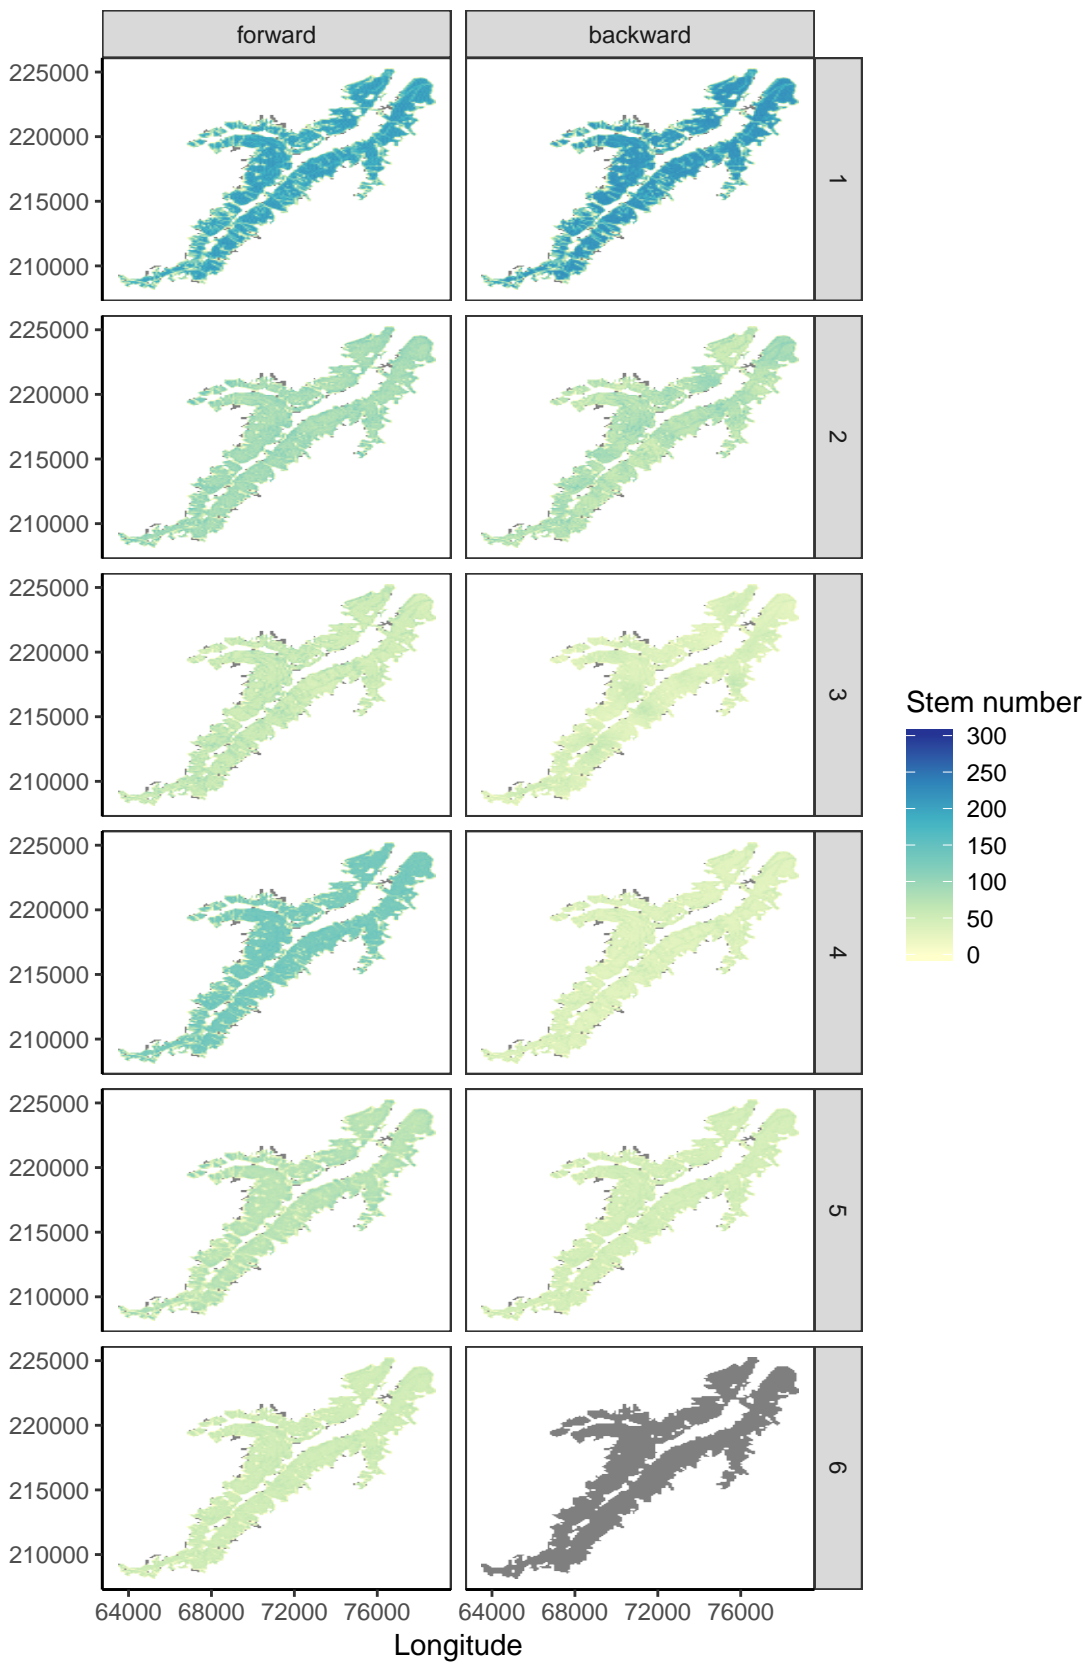

-10 %, uniform topo

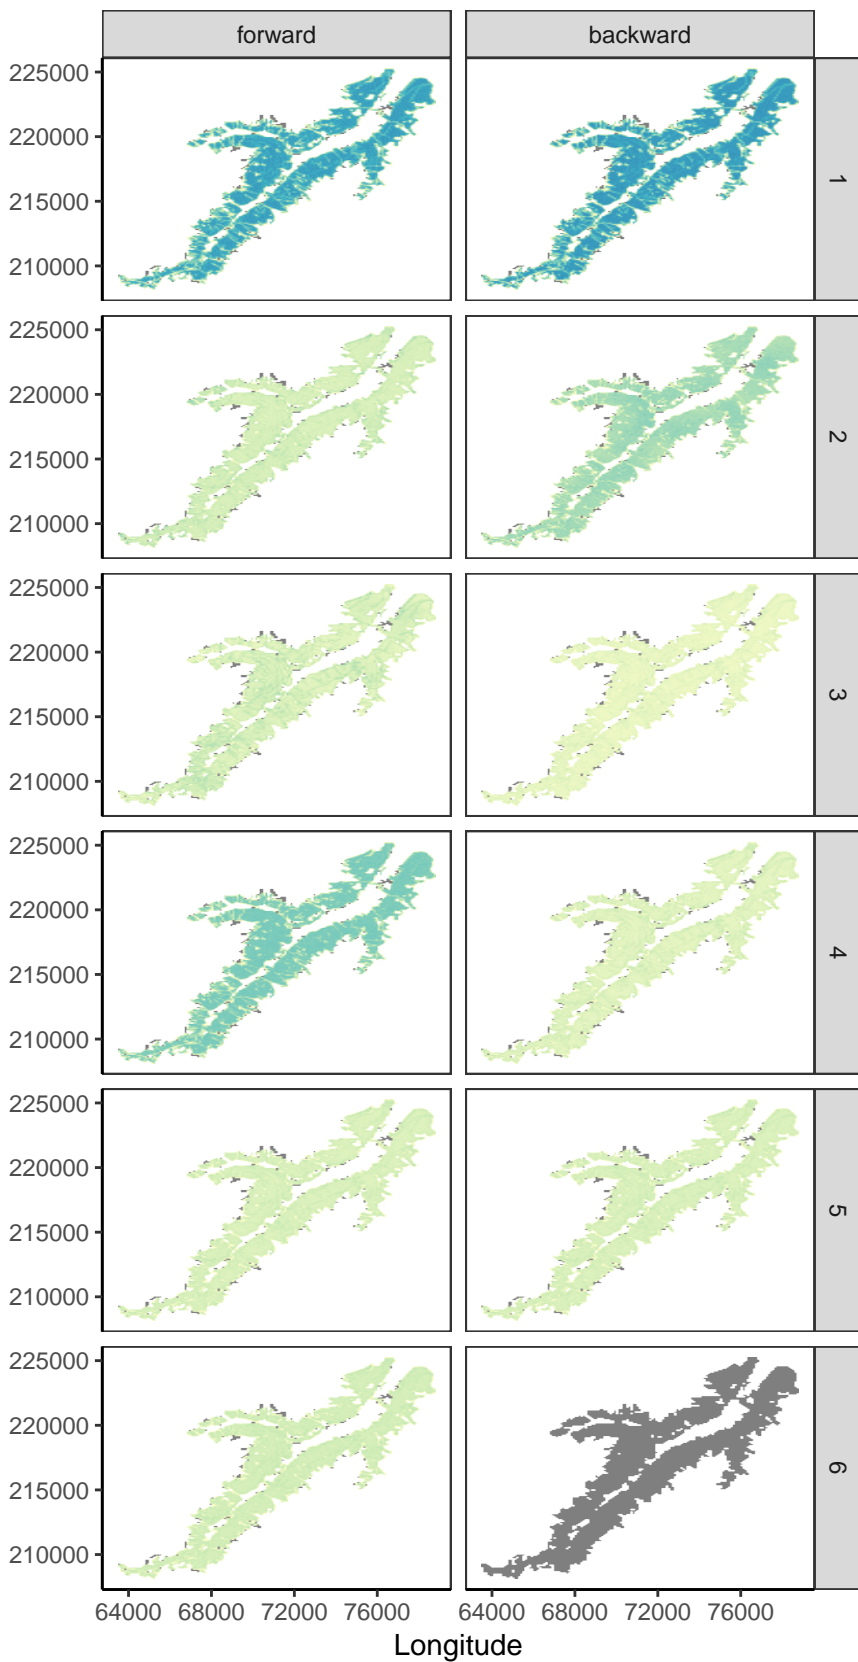

-20 %, uniform topo

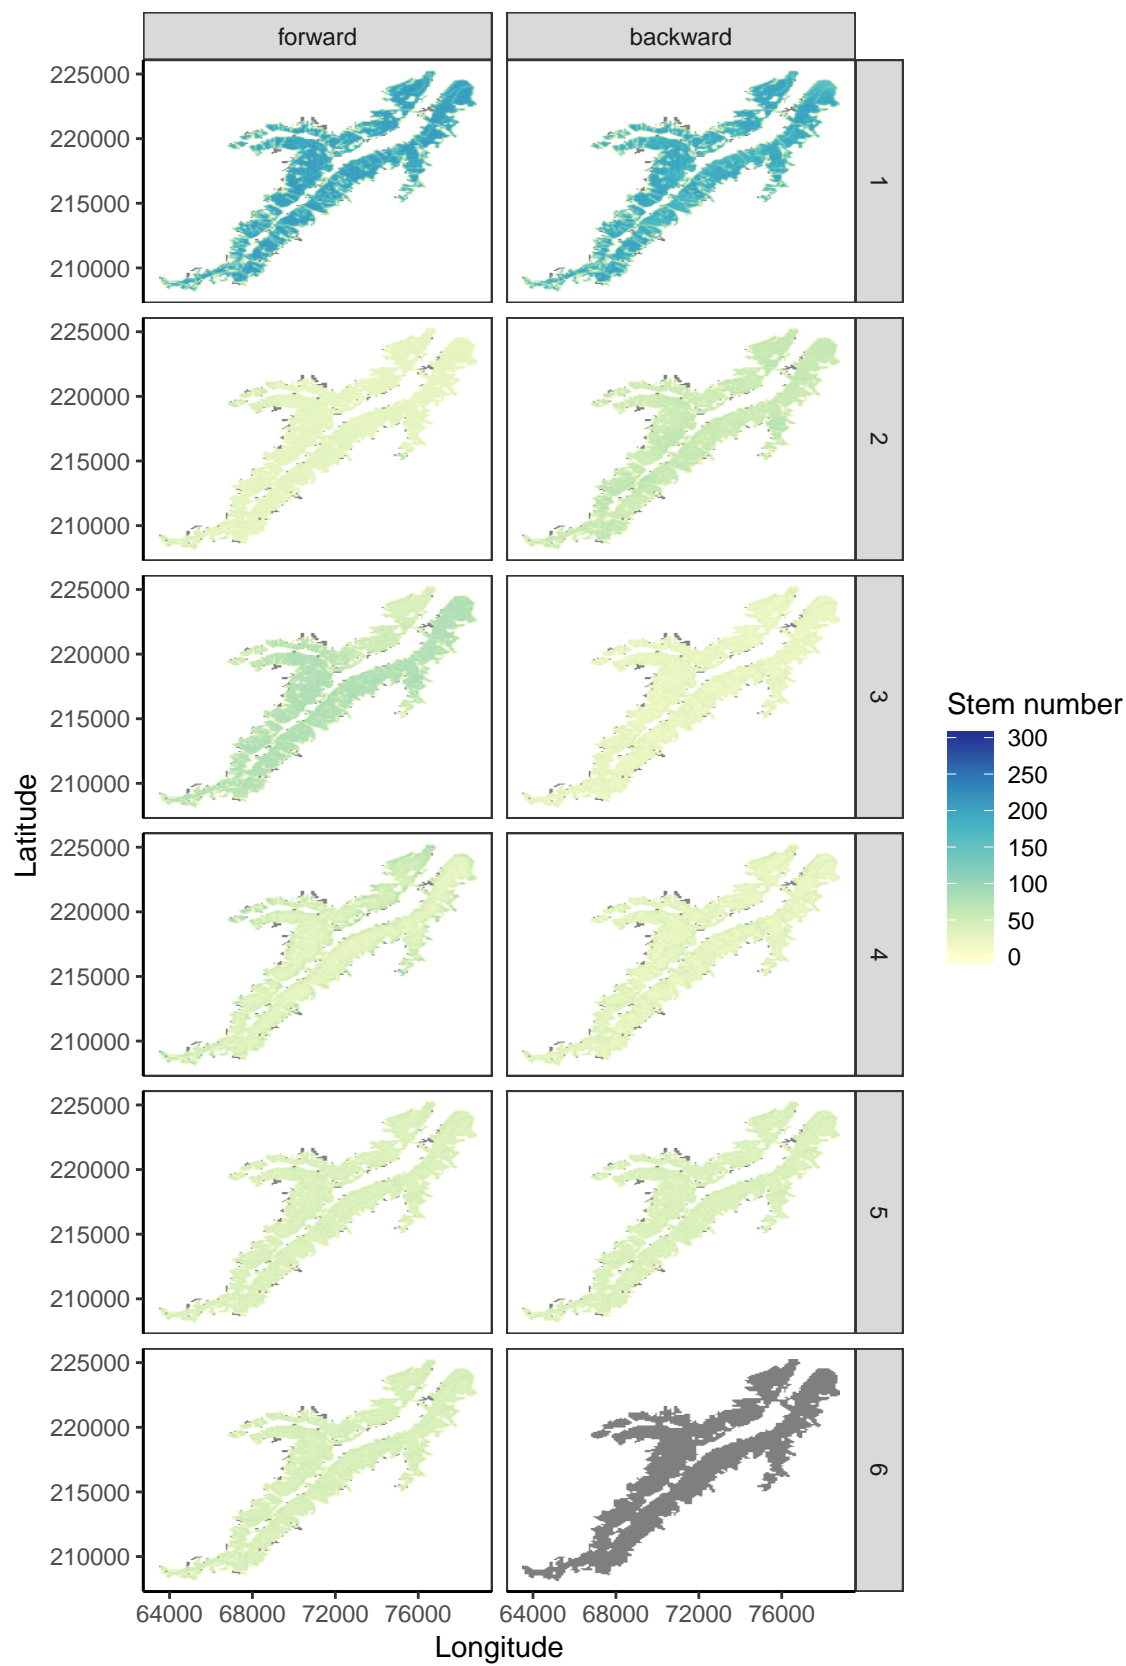

-30 %, uniform topo

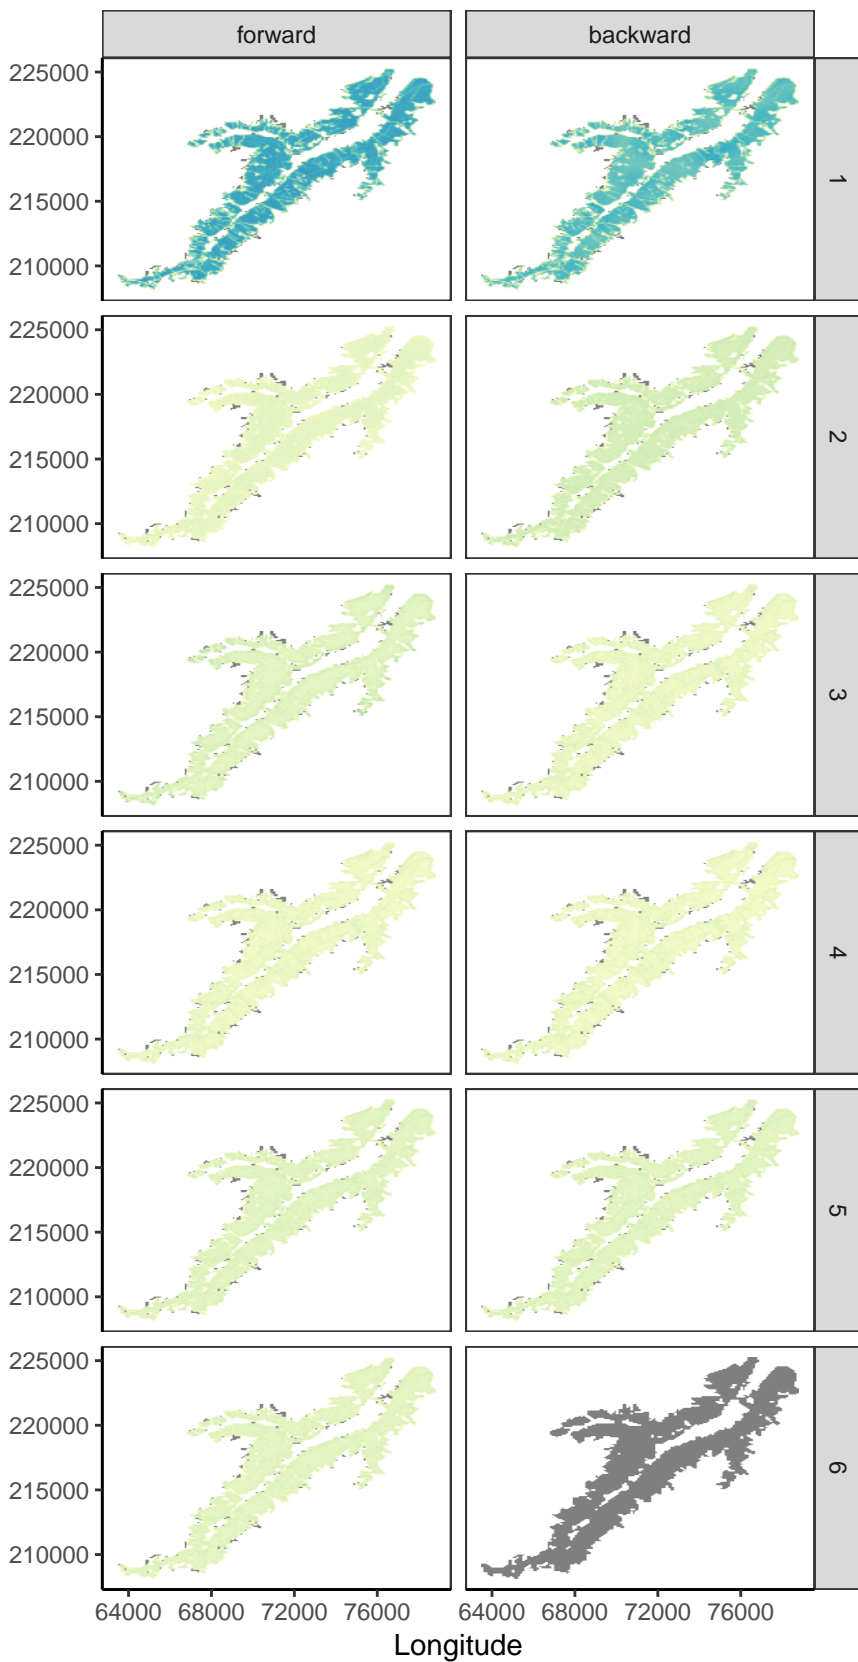

# Baseline, complex topo

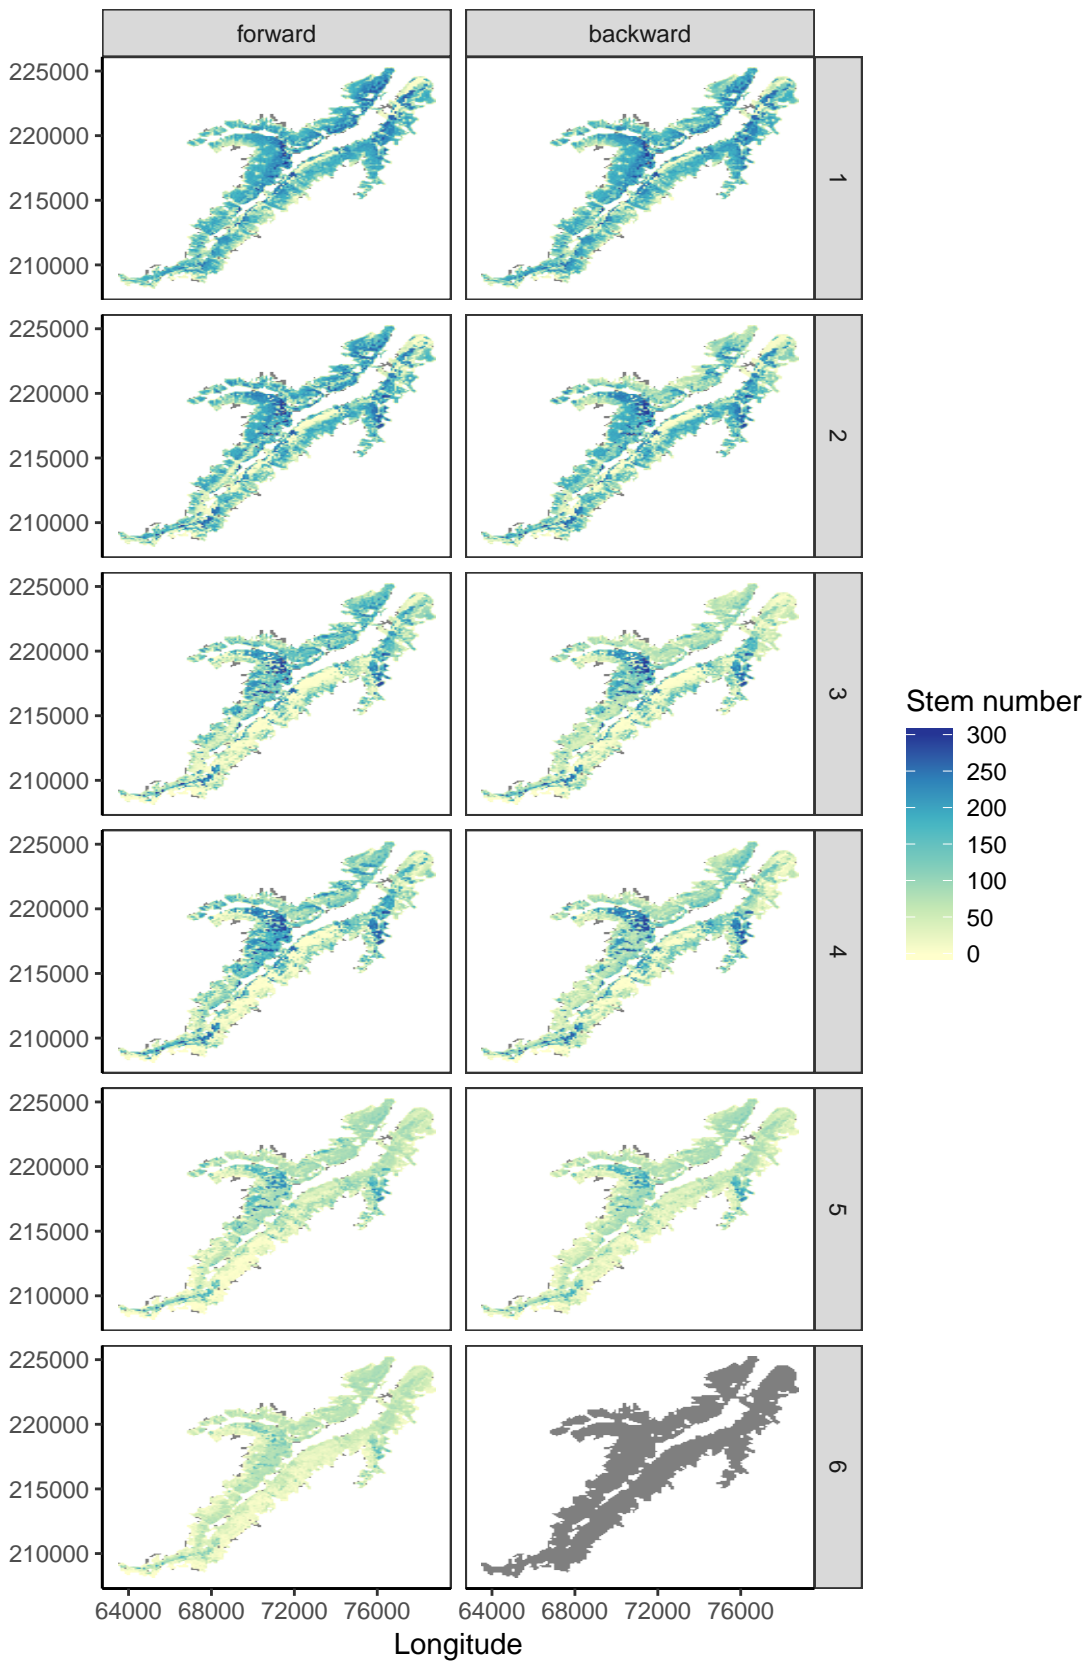

# -10 %, complex topo

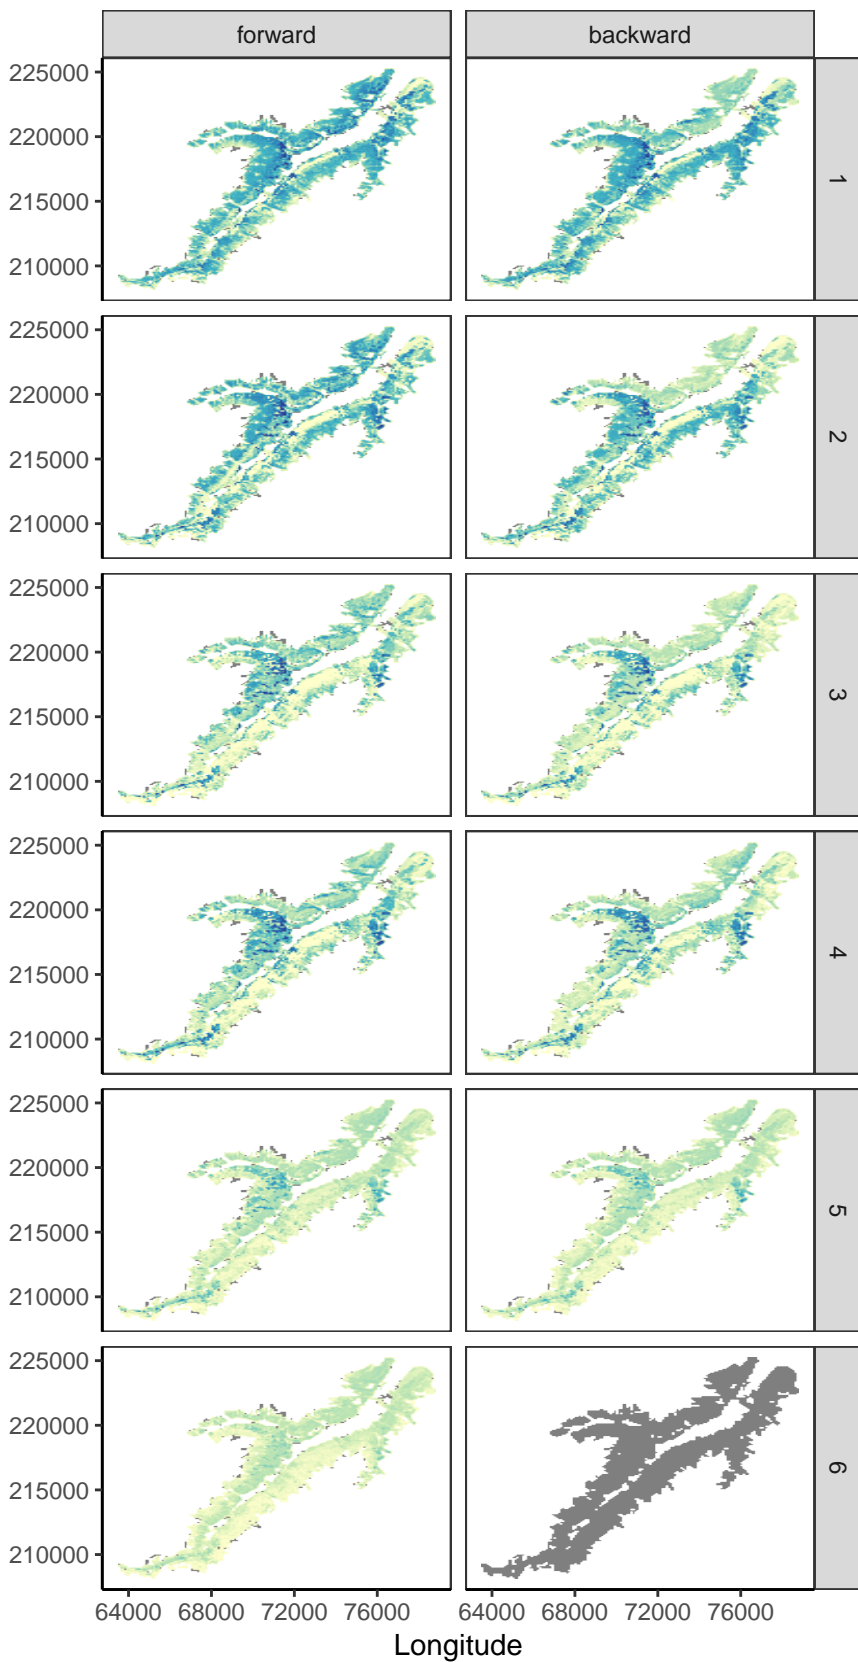

Stem number

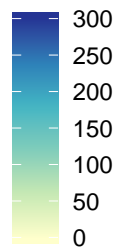



# -20 %, complex topo

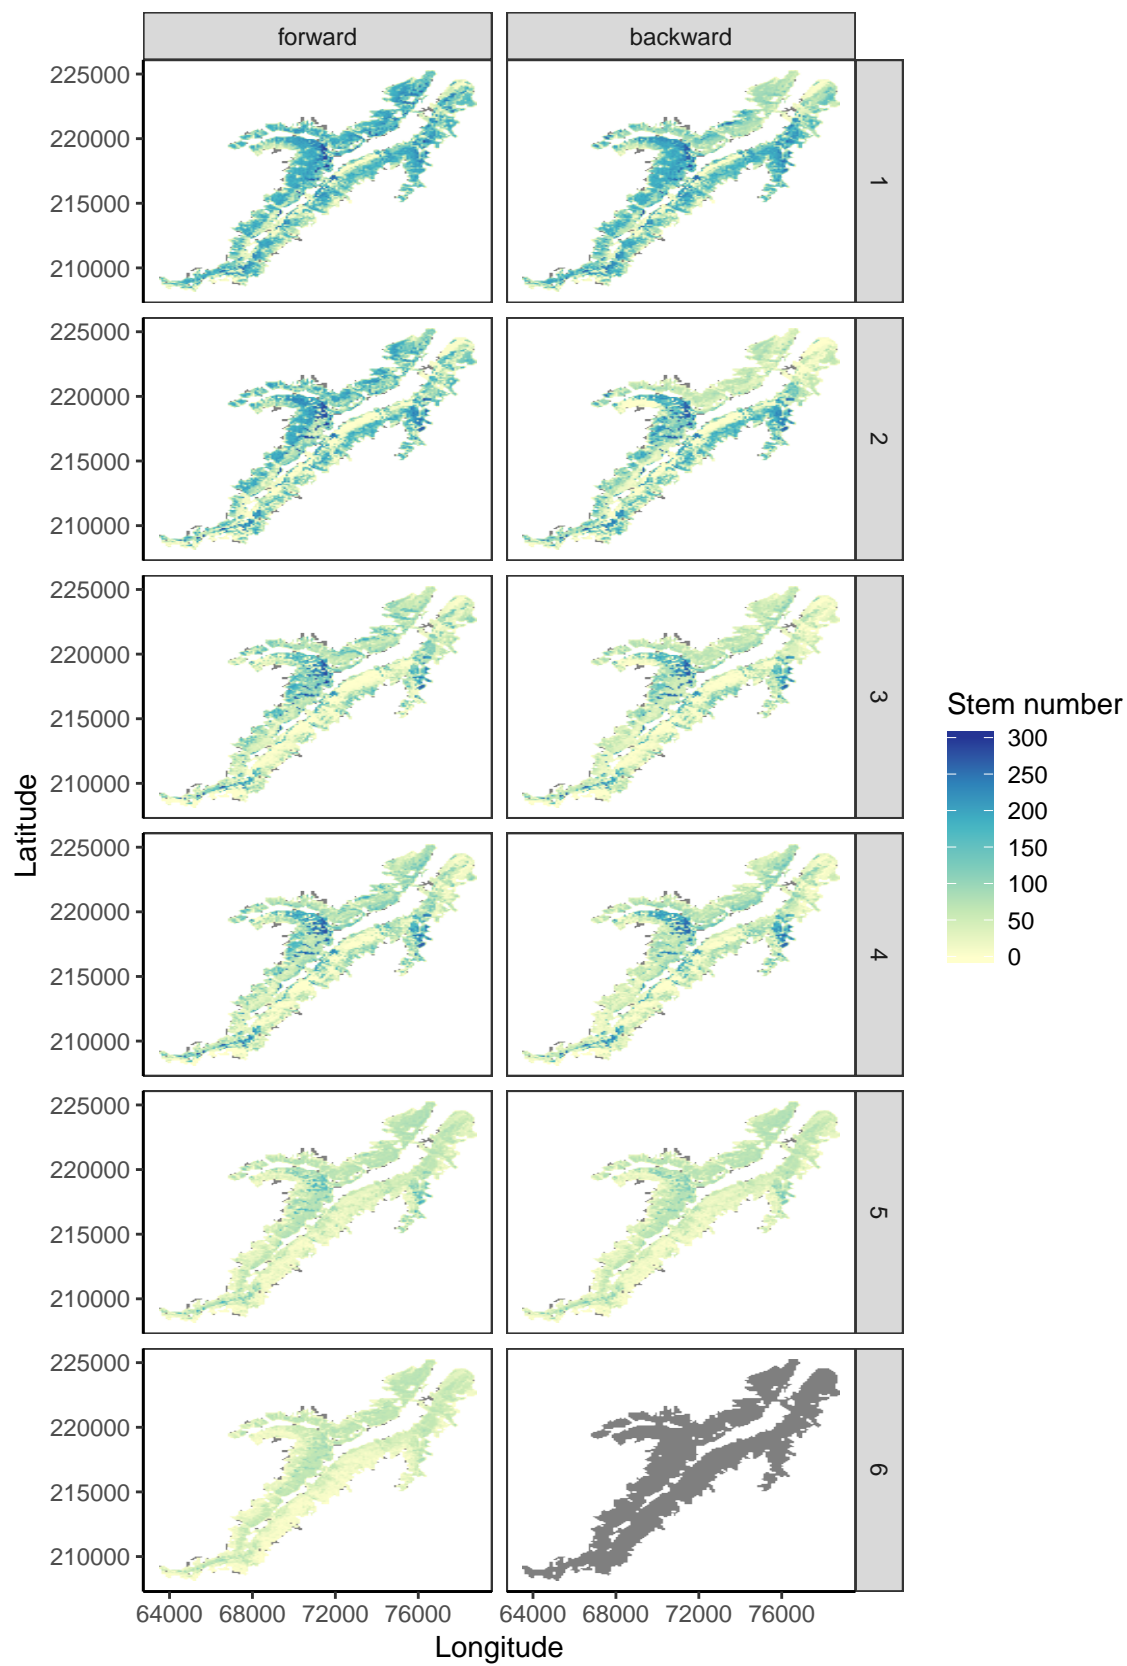



# -30 %, complex topo

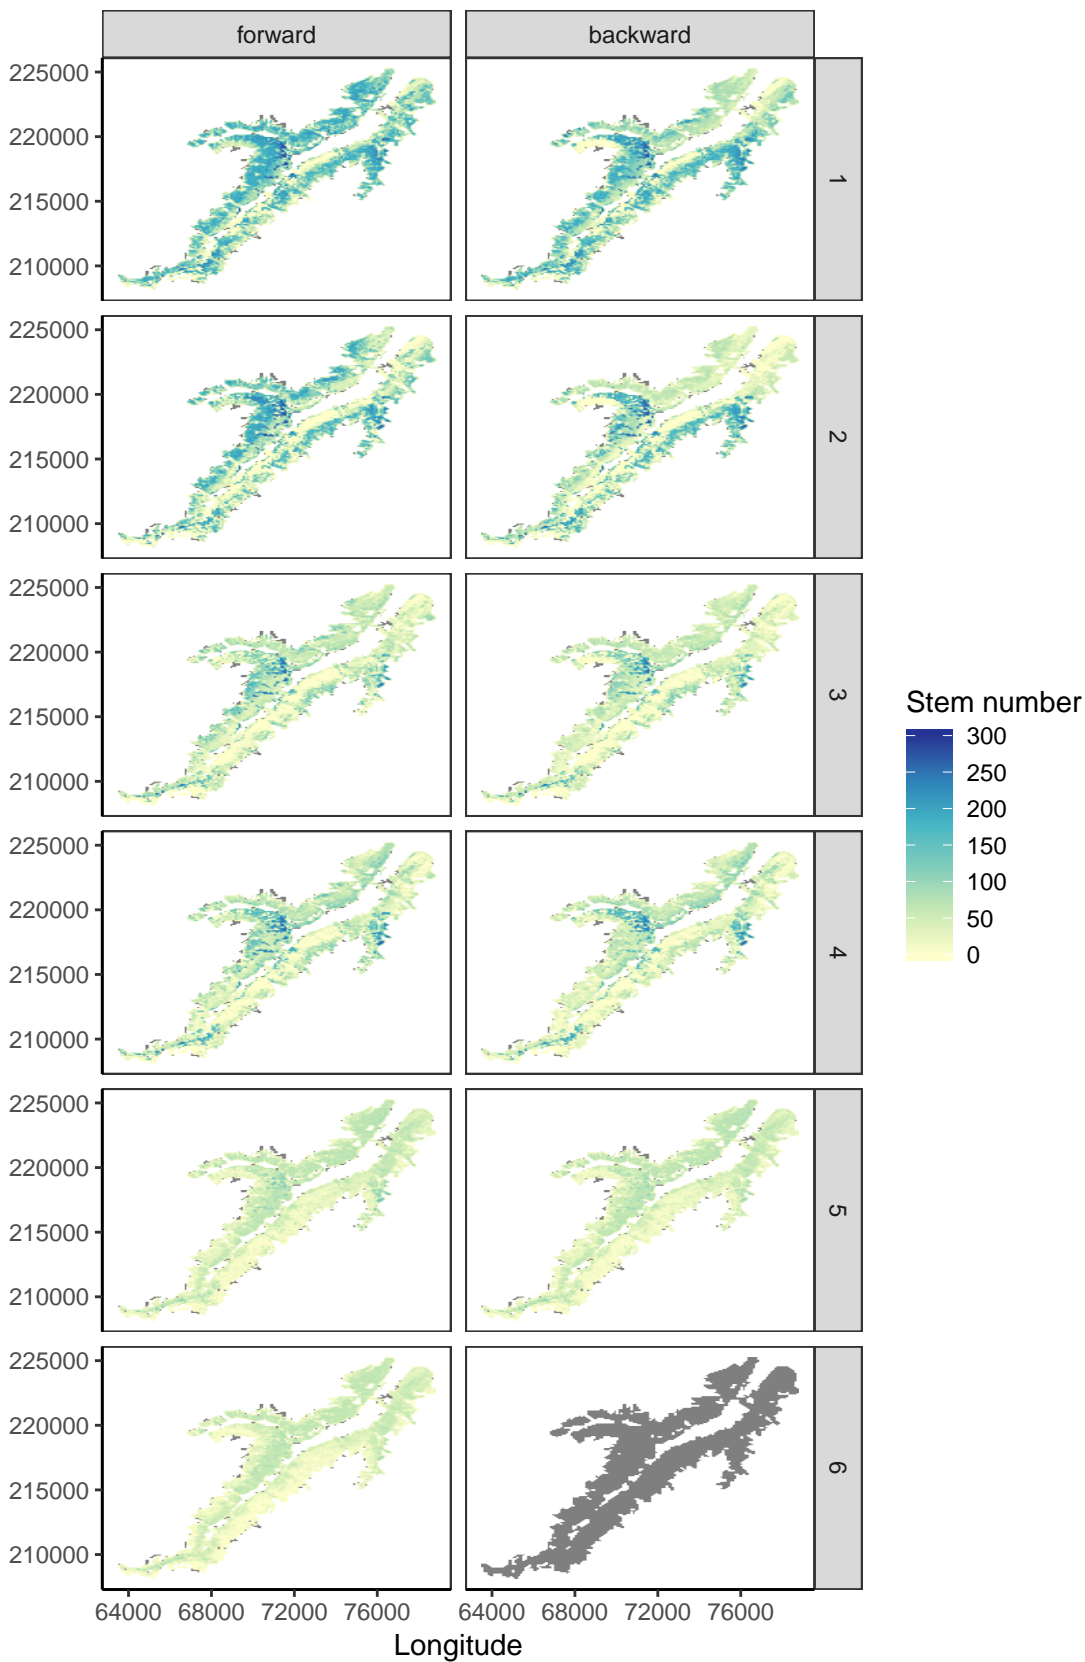

Supplement: GCB-26-4013-s002.pdf [file GCB-26-4013-s002.pdf]
